# Supplementary material for: TGF-β2 Regulates Transcription of the K+/Cl− Cotransporter 2 (KCC2) in Immature Neurons and Its Phosphorylation at T1007 in Differentiated Neurons
Source: MDPI journal article supplement (doi:10.3390/cells11233861), 2022-11-30
Supplement: s1 [file s1]

**Figure S1:** Molecular markers for pre-Bötzinger complex (preBötC) neurons. (A) Visualization of preBötC by double immunofluorescence for somatostatin (SST; red) and the neurokinin 1 receptor (NK1R; green) on fixed mouse brain cryosections. The preBötC with its NK1R+/SST+/Phox2b- “core” neurons is bordered by the red dotted circle, yellow dotted circle includes neurons of the nucleus ambiguus (NK1R+/SST-/Phox2b+), and cells of the facial nerve (N7, nucleus of the facial nerve) are bordered by the blue dotted circle (NK1R-/SST-/Phox2b+). (B) Immunolabeling for Phox2b applied to distinguish preBötC from neighbouring nuclei. Scale bar: 200µm
